# Supplementary material for: Rapid resistance profiling of SARS-CoV-2 protease inhibitors
Source: PubMed Central journal article supplement (PMC10055523; doi:10.21203/rs.3.rs-2627723/v1), 2023-03-15
Supplement: NIHPPrs2627723v1-supplement-1.pdf [file NIHPPrs2627723v1-supplement-1.pdf]

Online Supplementary Information for:

**Rapid resistance profiling of SARS-CoV-2 protease inhibitors**

Seyed Arad Moghadasi<sup>1</sup>, Rayhan G. Biswas<sup>1</sup>, Daniel A. Harki<sup>1</sup> & Reuben S. Harris<sup>1,2</sup>

<sup>1</sup> University of Minnesota, Minneapolis, Minnesota, USA

<sup>2</sup> Howard Hughes Medical Institute, University of Texas Health San Antonio, San Antonio, Texas, USA

Correspondence: mogha019@umn.edu and rsh@uthscsa.edu

Contents: Methods and Data Availability, Figures S1 and S2

**Methods and Data Availability**

**Cell culture**

All M<sup>pro</sup> inhibition assays were done as described with the live cell gain-of-signal assay using the pcDNA5/TO-Src-M<sup>pro</sup>-Tat-fLuc reporter construct<sup>12</sup>. All M<sup>pro</sup> single and double mutants selected for analysis here were based on recent reports of candidate resistant mutants<sup>2-9</sup> generated by site-directed mutagenesis (primers available upon request) and verified by Sanger sequencing. Transfections were done using 293T cells maintained at 37°C and 5% CO<sub>2</sub> in DMEM (Gibco catalog number 11875093) supplemented with 10% fetal bovine serum (ThermoFisher catalog number 11965084) and penicillin-streptomycin (Gibco catalog number 15140122).

### **M<sup>pro</sup> resistance experiments**

For each individual M<sup>pro</sup> variant, 3x10<sup>6</sup> 293T cells were plated in a 10cm dish and transfected 24h later with 2μg of the corresponding variant plasmid using TransIT-LT1 (Mirus catalog number MIR 2304). Transfected cells were incubated at 37°C and 5% CO<sub>2</sub> for 4h, washed once with phosphate buffered saline (PBS), trypsinized, resuspended in fresh media, and diluted to a concentration of 4x10<sup>5</sup> cells/ml. 50μL of each cell suspension was added to a 96-well white clear bottom cell culture plate (ThermoFisher #165306) containing pre-aliquoted inhibitor-supplemented media for a final concentration of 20,000 cells per well and inhibitor dose response range of 10μM to 2.4nM. Inhibitors were purchased from commercial vendors (nirmatrelvir, MedChemExpress catalog number HY-138687; ensitrelvir, MedChemExpress catalog number HY-143216; FB2001, Sigma-Aldrich catalog number SML2877) and purity was confirmed by HPLC and NMR. After an additional 44h incubation (48h total post-transfection), luciferase activity was quantified by removing growth medium and adding 50μL of Bright-Glo reagent (Promega catalog number E2610) to each well and incubating at room temperature in the dark for 2m before measuring luminescence on a Biotek Synergy H1 plate reader.

Percent M<sup>pro</sup> inhibition was calculated at each concentration of inhibitor using the formula below using the relative luminescence of an inhibitor (RLi) treated sample to the untreated control for each individual mutant.

$$\% \text{ inhibition} = \%100 - (100/(RLi))$$

Results were plotted using GraphPad Prism 9 and fit using a four-parameter non-linear regression to calculate IC<sub>50</sub> values (**Figure S1; Table 1**). Resistance of mutants was calculated by the fold change in IC<sub>50</sub> of the mutant relative to WT M<sup>pro</sup>, and these values were used to generate a heatmap

in GraphPad Prism9 (**Figure 1B**).

As an increase in luminescence in the absence of any inhibitor treatment is indicative of decreased M<sup>pro</sup> catalytic activity, the relative activity of each mutant was calculated by the formula below using the relative luminescence of a mutant (RL<sub>m</sub>) to the WT enzyme in the absence of inhibitor (**Figure S2**).

$$\% \text{ activity} = \%100 - [100/RL_m]$$

### **Data Availability**

All results are presented in the main display items or supplementary figures. The M<sup>pro</sup> gain-of-signal system is available upon email request to [rsh@uthscsa.edu](mailto:rsh@uthscsa.edu) and completion of a MTA (U.S. Provisional Application Serial No. 63/108,611, filed on November 2, 2020).

### **Ethics**

Studies here were performed under University of Minnesota IBC protocol 1902-36822H to RSH, University of Minnesota IBC protocol 2111-39591H to DAH, and University of Texas Health San Antonio IBC B-00000013853 to RSH.

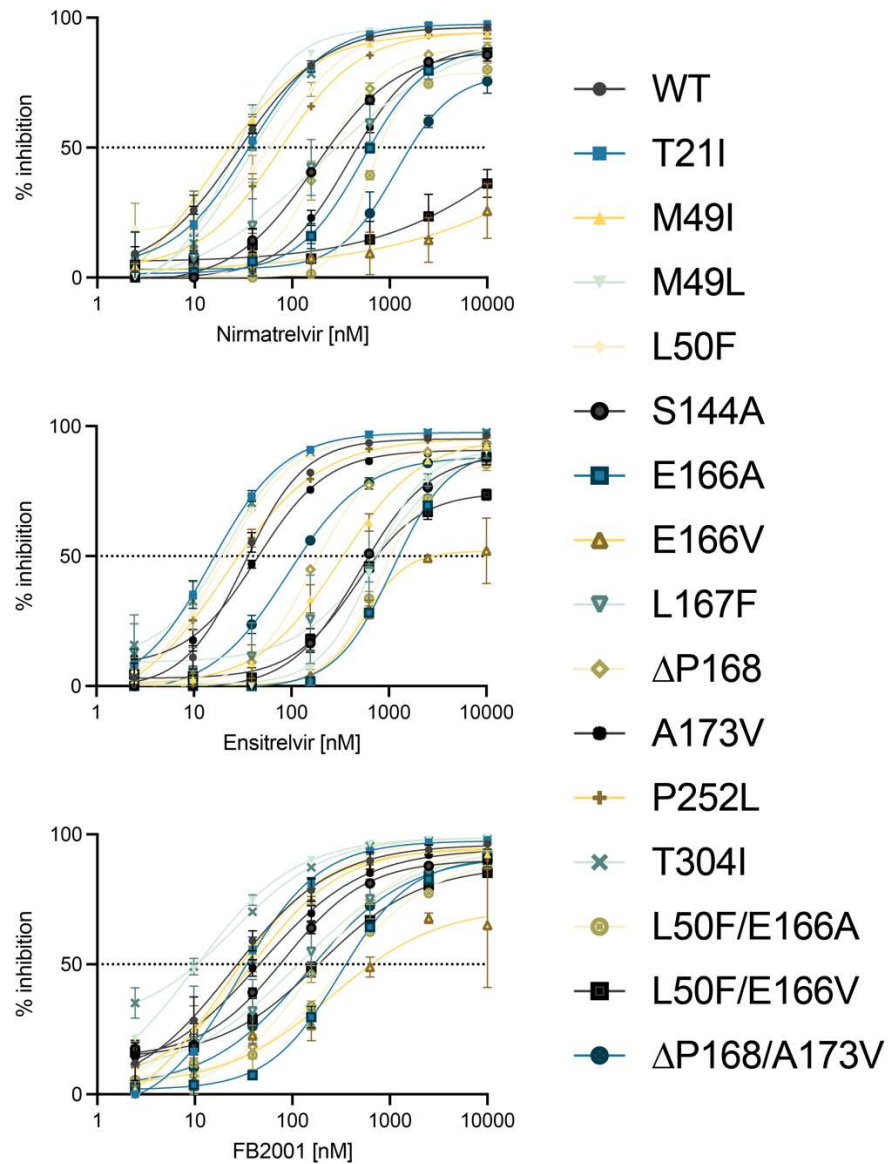

**Figure S1. Dose response curves showing inhibition of WT and mutant  $M^{Pro}$  enzymes by nirmatrelvir, ensitrelvir, and FB2001. Dose response of respective  $M^{Pro}$  variants using the gain-**

of-signal assay in cells treated with indicated inhibitors in a 4-fold serial dilution beginning at 10 $\mu$ M (data are mean  $\pm$  SD of biologically independent triplicate experiments). IC<sub>50</sub> values for each inhibitor are listed in **Table 1**.

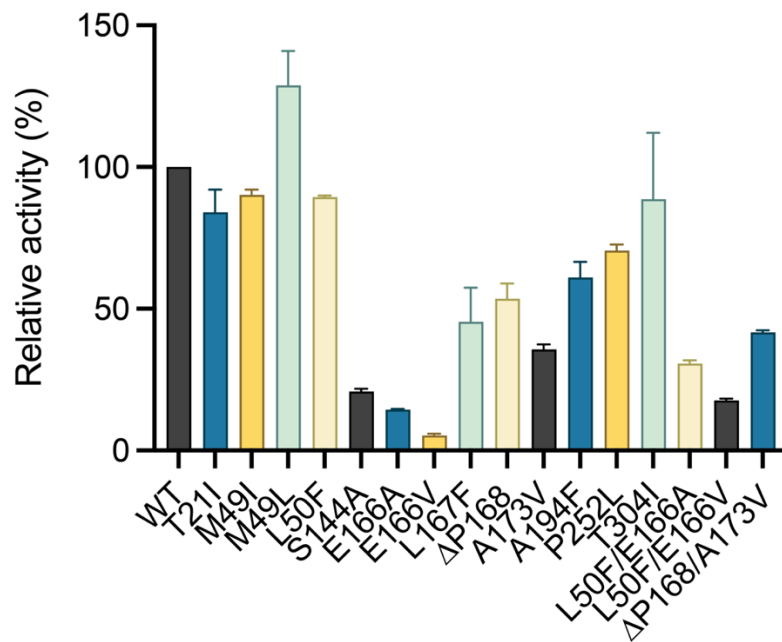

**Figure S2. Relative activity of M<sup>pro</sup> mutants.** A histogram showing the relative catalytic activity of each M<sup>pro</sup> mutant relative to the WT construct (normalized to 100% to facilitate comparison). Several single mutants such as T21I, M49I, M49L, L50F, and T304I show near WT activity. Other mutants such as A173V show modest 1.5 to 3-fold decreases in relative activity, and a few such as E166V are severely compromised. L50F partly restores the activity of E166A and E166V mutants consistent with prior reports<sup>2-9</sup>.
